# Supplementary material for: Comparing the suitability of sodium hyposulfite, hydroxylamine hydrochloride and sodium sulfite as the quenching agents for permanganate oxidation
Source: Royal Society of Chemistry journal article supplement (doi:10.1039/c6ra01209d), 2016-01-01
Supplement: c6ra01209d1.pdf [file c6ra01209d1.pdf]

## SUPPORTING INFORMATION

# Comparing the Suitability of Sodium Hyposulfite, Hydroxylamine Hydrochloride and Sodium Sulfite as the Quenching Agents for Permanganate Oxidation†

Bo Sun<sup>a</sup>, Dandan Rao<sup>b</sup>, Hongyu Dong<sup>b</sup> and Xiaohong Guan<sup>\*a,b</sup>

<sup>a</sup>State Key Laboratory of Urban Water Resource and Environment, Harbin Institute of Technology, Harbin 150090, People's Republic of China

<sup>b</sup>State Key Laboratory of Pollution Control and Resources Reuse, College of Environmental Science and Engineering, Tongji University, Shanghai 20092, People's Republic of China

†Electronic supplementary information (ESI) available.

E-mail addresses: sunbo880628@163.com (B. Sun), 541502729@qq.com (D.D. Rao), gndong@126.com (H.Y. Dong), hitgXH@126.com (X.H. Guan)

\*Contact/Corresponding author contact information:

Xiaohong Guan, Email: hitgXH@126.com; Phone: +86(21) 65980956

| <b>Table of Contents</b>                                                                                                                                                           | <b>Pages</b> |
|------------------------------------------------------------------------------------------------------------------------------------------------------------------------------------|--------------|
| Figure S1. Degradation kinetic of aniline by $\text{KMnO}_4$ .                                                                                                                     | S3           |
| Figure S2. Conditional oxidation reduction potential of $\text{NH}_2\text{OH}/\text{N}_2\text{O}$ and $\text{NH}_3\text{OH}^+/\text{N}_2\text{O}$ .                                | S4           |
| Figure S3. Variation of phenol concentration as a function of time in the $\text{KMnO}_4/\text{Na}_2\text{SO}_3$ process at pH 5.0.                                                | S5           |
| Figure S4. Relative rate method                                                                                                                                                    | S6           |
| Table S1. The second-order rate constants of phenol, $\text{Na}_2\text{S}_2\text{O}_3$ , $\text{NH}_2\text{OH}\cdot\text{HCl}$ and $\text{Na}_2\text{SO}_3$ with $\text{KMnO}_4$ . | S7           |
| Table S2. The second-order rate constants of BPA and phenol oxidation by Mn(III).                                                                                                  | S8           |
| Reference.                                                                                                                                                                         | S9           |

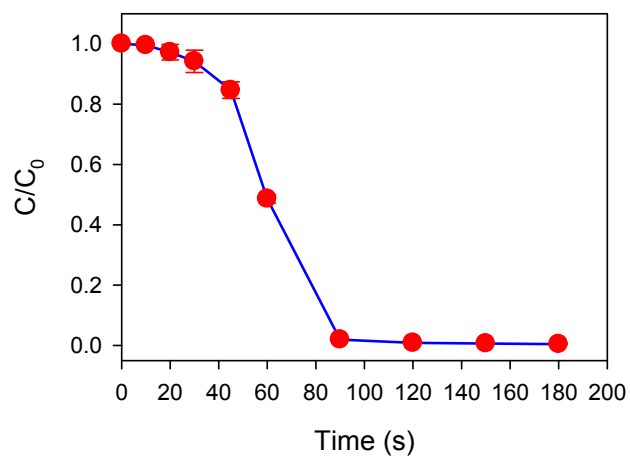

1

2

**Figure S1.** Time course of aniline oxidation by  $\text{KMnO}_4$  at pH 4.0. Reaction conditions:  $[\text{aniline}]_0 = 5 \mu\text{M}$ ,  $[\text{KMnO}_4]_0 = 50 \mu\text{M}$ .

3

4

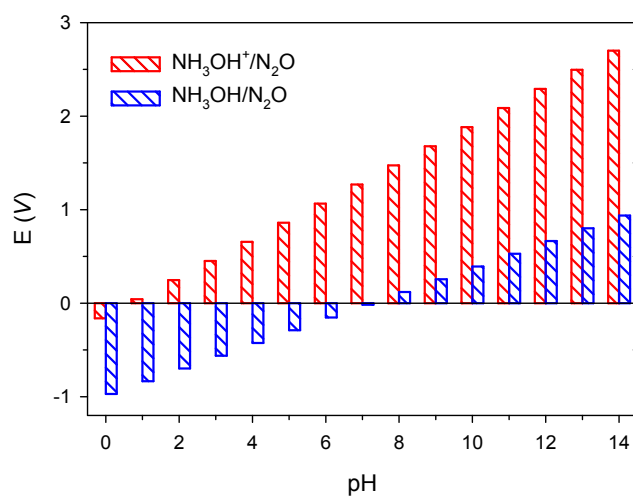

5

6 **Figure S2.** Conditional oxidation reduction potential of  $\text{NH}_2\text{OH}/\text{N}_2\text{O}$  and

7  $\text{NH}_3\text{OH}^+/\text{N}_2\text{O}$  at different pH with  $500 \mu\text{M}$   $\text{NH}_2\text{OH}$  or  $\text{NH}_3\text{OH}^+$ .

8

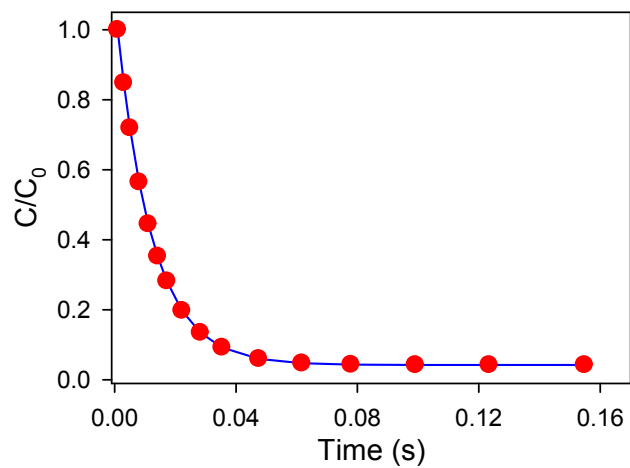

9

10

11

12

13

**Figure S3.** Variation of phenol concentration as a function of time in the  $\text{KMnO}_4/\text{Na}_2\text{SO}_3$  process at pH 5.0. Reaction conditions:  $[\text{KMnO}_4]_0 = 50 \mu\text{M}$ ;  $[\text{Na}_2\text{SO}_3]_0 = 500 \mu\text{M}$ ,  $[\text{Phenol}]_0 = 5 \mu\text{M}$ .

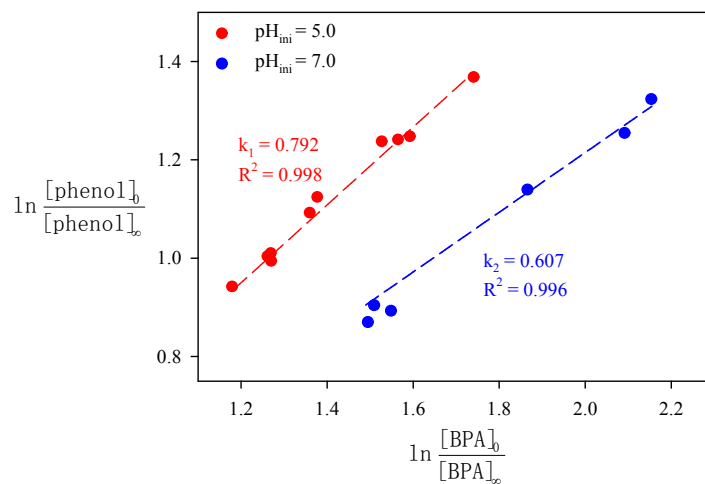

14

15 **Figure S4.** Plots of  $\ln \frac{C_{BPA}^0}{C_{BPA}^\infty}$  vs  $\ln \frac{C_{phenol}^0}{C_{phenol}^\infty}$  in the  $KMnO_4/Na_2SO_3$  process. Reaction

16 conditions:  $[KMnO_4]_0 = 50 \mu M$ ,  $[Na_2SO_3]_0 = 250 \mu M$ , the concentration of phenol

17 and BPA changed from  $5 \mu M$  to  $15 \mu M$ .

18 **Table S1.** The second-order rate constants of phenol, Na<sub>2</sub>S<sub>2</sub>O<sub>3</sub>, NH<sub>2</sub>OH•HCl and

19 Na<sub>2</sub>SO<sub>3</sub> oxidation by KMnO<sub>4</sub>.

| pH   | $k_{phenol}(M^{-1}s^{-1})$ | $k_{Na_2S_2O_3}(M^{-1}s^{-1})$ | $k_{NH_2OH\cdot HCl}(M^{-1}s^{-1})$ | $k_{Na_2SO_3}(M^{-1}s^{-1})$      |
|------|----------------------------|--------------------------------|-------------------------------------|-----------------------------------|
| 2.0  | 342                        | 1.29×10 <sup>6</sup>           | 175.6                               | -                                 |
| 3.0  | 20.0                       | 3.58×10 <sup>5</sup>           | 148.0                               | -                                 |
| 4.0  | 6.73                       | 1.49×10 <sup>4</sup>           | 57.2                                | 2.39×10 <sup>4</sup>              |
| 5.0  | 4.73                       | 2.95×10 <sup>3</sup>           | 58.0                                | <sup>a</sup> 3.73×10 <sup>4</sup> |
| 6.0  | 0.567                      | 1.84×10 <sup>3</sup>           | 607.8                               | <sup>a</sup> 4.70×10 <sup>4</sup> |
| 7.0  | 15.8                       | 2.20×10 <sup>3</sup>           | 8.66×10 <sup>3</sup>                | <sup>a</sup> 4.87×10 <sup>4</sup> |
| 8.0  | 24.1                       | 1.32×10 <sup>3</sup>           | 1.16×10 <sup>4</sup>                | <sup>a</sup> 4.49×10 <sup>4</sup> |
| 9.0  | 43.4                       | 1.08×10 <sup>3</sup>           | 1.27×10 <sup>4</sup>                | <sup>a</sup> 5.04×10 <sup>4</sup> |
| 10.0 | 57.8                       | 1.13×10 <sup>3</sup>           | 1.21×10 <sup>4</sup>                | 5.67×10 <sup>4</sup>              |
| 11.0 | 33.1                       | 2.70×10 <sup>3</sup>           | 1.40×10 <sup>4</sup>                | 8.4×10 <sup>4</sup>               |

20

<sup>a</sup>obtained from our previous study<sup>1</sup>

21 **Table S2.** The second-order rate constants of BPA and phenol oxidation by Mn(III)

| pH  | <sup>b</sup> $k_{\text{BPA}}$ (M <sup>-1</sup> s <sup>-1</sup> ) | $k_{\text{phenol}}$ (M <sup>-1</sup> s <sup>-1</sup> ) |
|-----|------------------------------------------------------------------|--------------------------------------------------------|
| 5.0 | 4.21×10 <sup>5</sup>                                             | 3.33×10 <sup>5</sup>                                   |
| 7.0 | 1.37×10 <sup>5</sup>                                             | 8.32×10 <sup>4</sup>                                   |

22 <sup>b</sup>obtained from our previous study<sup>1</sup>

23

24



## Reference

1. B. Sun, H.Y. Dong, D. He, D.D. Rao, X.H. Guan, *Environ. Sci. Technol.* **2016**.  
<http://pubs.acs.org/doi/abs/10.1021/acs.est.5b05207>.
